# Supplementary material for: A feedback regulatory loop between methyltransferase PRMT1 and orphan receptor TR3
Source: Oxford University Press journal article supplement (doi:10.1093/nar/gkn941), 2008-12-18
Supplement: gkn941_Supplementary_Data.zip [file gkn941_Supplementary_Data.zip]

Archive with 1 entries (1 files):
- nar-02030-x-2008-File003.pdf
